# Supplementary material
Source: publisher site journal article supplement (https://www.dovepress.com/article/supplementary_file/583656/583656%20Revised%20Supplementary%20Materials.xlsx)
Supplement: Supplementary file 1 [file 583656%20Revised%20Supplementary%20Materials.xlsx]

## Sheet: Sheet1
Table S1. Percentage of Total Samples Undergoing Missing Data Imputation
ID	Gly	Ala	GABA	Ser	Pro	Val	Thr	Ile	Leu	Asn	Orn	Asp	Hcy	Gln	Lys	Glu	Met	His	Phe	Arg	Tyr	Trp	Acetic acid	Propionic acid	Isobutyric acid	Butyric acid	Isovaleric acid	Valeric acid	Caproic acid	Gender	Age	Height	Weight	BMI	Waistline	Abdominal	Hipline	WHR	AHR	ALT	AST	GGT	SCR	eGFR	UA	TC	TG	HDL-C	LDL-C
Number of missing data imputation	37	0	84	0	0	0	0	0	0	0	0	0	54	0	0	0	0	0	0	0	0	0	0	16	6	16	3	17	17	0	0	0	1	1	6	6	6	6	6	0	0	0	0	1	0	0	0	0	0
Percentage of missing data imputation	0.266187	0	0.604317	0	0	0	0	0	0	0	0	0	0.388489	0	0	0	0	0	0	0	0	0	0	0.115108	0.0431655	0.115108	0.0215827	0.122302	0.122302	0	0	0	0.00719424	0.00719424	0.0431655	0.0431655	0.0431655	0.0431655	0.0431655	0	0	0	0	0.00719424	0	0	0	0	0
[truncated: 18 more columns]
